# Supplementary material for: The Unbearable Weight of Gender Inequalities: Development and Validation of the Social Treatment and Experiences of Women (STEW) Scale
Source: Springer Nature journal article supplement (doi:10.1007/s11199-024-01555-1), 2025-01-01
Supplement: MOESM1 [file 11199_2024_1555_MOESM1_ESM.docx]

Online supplement for Ciaffoni, S., Rubini, M., & Moscatelli, S. (2024). The unbearable weight of gender inequalities: Development and validation of the Multidimensional Gender Inequalities Perceptions Inventory. *Sex Roles*. Stefano Ciaffoni, University of Bologna. Email: stefano.ciaffoni2@unibo.it

**Table S1.**

*Sociodemographic Characteristics of Participants (Studies 1–5)*

| **Demographic characteristic** | **Study 1**  (*N =*703) | | **Study 2**  (*N =*550) | | **Study 3a**  (*N =*132) | | **Study 3b**  (*N =*96) | | **Study 4**  (*N* = 201) | | **Study 5**  (*N* = 233) | |
| --- | --- | --- | --- | --- | --- | --- | --- | --- | --- | --- | --- | --- |
| *n* | % | *n* | % | *n* | % | *n* | % | *n* | *%* | *n* | *%* |
| **Gender** |  |  |  |  |  |  |  |  |  | |  | |
| Women | 703 | 100 | 546 | 99.30 | 132 | 100 | 96 | 100 | 201 | 100 | 228 | 97.90 |
| Men | - | - | - | - | - | - | - | - | - | - | - | - |
| Non-binary | - | - | 4 | 0.70 | - | - | - | - | - | - | 5 | 2.10 |
| **Nationality** |  |  |  |  |  |  |  |  |  |  |  | |
| Italian | 596 | 84.79 | 390 | 70.92 | 127 | 95.45 | 96 | 100 | 3 | 1.49 | 227 | 97.80 |
| Portuguese | 1 | 0.14 | - | - | - | - | - | - | - | - | - | - |
| Moldavian | 1 | 0.14 | - | - | - | - | - | - | - | - | - | - |
| Brazilian | 1 | 0.14 | - | - | - | - | - | - | - | - | - | - |
| Albanian | - | - | 4 | 0.73 | - | - | - | - | - | - | 2 | 0.90 |
| Indian | - | - | 1 | 0.18 | - | - | - | - | 1 | 0.50 | - | - |
| Bulgarian | - | - | 1 | 0.18 | - | - | - | - | 1 | 0.50 | - | - |
| Tunisian | - | - | 1 | 0.18 | - | - | - | - | - | - | - | - |
| Romanian | - | - | 1 | 0.18 | - | - | - | - | - | - | - | - |
| Swiss | - | - | 1 | 0.18 | - | - | - | - | - | - | - | - |
| British | - | - | - | - | - | - | - | - | 162 | 80.60 | - | - |
| English | - | - | - | - | - | - | - | - | 14 | 6.97 | - | - |
| Scottish | - | - | - | - | - | - | - | - | 3 | 1.49 | - | - |
| Welsh | - | - | - | - | - | - | - | - | 1 | 0.50 | - | - |
| American | - | - | - | - | - | - | - | - | 2 | 1.00 | - | - |
| Canadian | - | - | - | - | - | - | - | - | 1 | 0.50 | - | - |
| Egyptian | - | - | - | - | - | - | - | - | 1 | 0.50 | - | - |
| German | - | - | - | - | - | - | - | - | 1 | 0.50 | - | - |
| Greek | - | - | - | - | - | - | - | - | 1 | 0.50 | - | - |
|  |  |  |  |  |  |  |  |  |  |  |  |  |
| Irish | - | - | - | - | - | - | - | - | 1 | 0.50 | - | - |
| Polish | - | - | - | - | - | - | - | - | 4 | 1.99 | 2 | 0.90 |
| Russian | - | - | - | - | - | - | - | - | 1 | 0.50 | - | - |
| Slovak | - | - | - | - | - | - | - | - | 1 | 0.50 | - | - |
| Ukrainian | - | - | - | - | - | - | - | - | 1 | 0.50 | - | - |
| Zimbabwean | - | - | - | - | - | - | - | - | 1 | 0.50 | - | - |
| Latvian | - | - | - | - | - | - | - | - | 1 | 0.50 | - | - |
| French | - | - | - | - | - | - | - | - | - | - | 1 | 0.40 |
| No answer at all | 104 | 14.79 | 151 | 27.45 | 6 | 4.55 | - | - | - | - | - | - |
| **Sexual orientation** |  |  |  |  |  |  |  |  |  |  |  | |
| Straight | 557 | 79.23 | 319 | 58 | 119 | 90.15 | 96 | 100 | 176 | 87.56 | 194 | 83.26 |
| Bisexual | 18 | 2.56 | 42 | 7.64 | 1 | 0.76 | - | - | 14 | 6.97 | 24 | 10.30 |
| Homosexual | 5 | 0.71 | 7 | 1.27 | - | - | - | - | 7 | 3.48 | 7 | 3.00 |
| Pansexual | 3 | 0.43 | 18 | 3.27 | 1 | 0.76 | - | - | 3 | 1.49 | 5 | 2.15 |
| Asexual | 1 | 0.14 | 2 | 0.36 | 1 | 0.76 | - | - | 1 | 0.50 | 1 | 0.43 |
| Queer | - | - | 5 | 0.91 | - | - | - | - | - | - | 1 | 0.43 |
| Do not know yet | 1 | 0.14 | - | - | - | - | - | - | - | - | - | - |
| Preferred not to say | 17 | 2.42 | 10 | 1.82 | 10 | 7.58 | - | - | - | - | - | - |
| No answer at all | 101 | 14.4 | 147 | 26.73 | - | - | - | - | - | - | 1 | 0.43 |
| **Educational level*** |  |  |  |  |  |  |  |  |  |  |  | |
| Primary school | 1 | 0.14 | - | - | - | - | - | - | - | - | - | - |
| Middle school | 20 | 2.84 | - | - | 1 | 0.76 | - | - | 2 | 1.00 | - | - |
| High school | 218 | 31.01 | - | - | 37 | 28.03 | 29 | 30.21 | 70 | 34.83 | - | - |
| Bachelor’s degree | 43 | 6.12 | 227 | 41.27 | 16 | 12.12 | 7 | 7.29 | 95 | 47.26 | - | - |
| First level Master | 21 | 2.99 | - | - | 1 | 0.76 | 4 | 4.17 | - | - | - | - |
| Master’s degree | 212 | 30.16 | 165 | 30.00 | 53 | 40.15 | 40 | 41.67 | 22 | 10.95 | - | - |
| Second Level Master | 24 | 3.41 | 1 | 0.18 | 8 | 6.06 | 3 | 3.13 | - | - | - | - |
| PhD | 34 | 4.84 | 3 | 0.55 | 6 | 4.55 | 6 | 6.25 | 9 | 4.48 | - | - |
| Other specialization | - | - | 5 | 0.91 | 5 | 3.79 | 6 | 6.25 | - | - | - | - |
| Preferred not to say | 5 | 0.71 | - | - | 3 | 2.27 | 1 | 1.04 | - | - | - | - |
| Other types of education | 31 | 4.41 | - | - | 1 | 0.76 | - | - | 3 | 1.49 | - | - |
| No answer at all | 94 | 13.37 | 149 | 27.09 | 1 | 0.76 | - | - | - | - | - | - |
| **Employment** |  |  |  |  |  |  |  |  |  |  |  | |
| Unemployed | 4 | 0.57 | - | - | - | - | - | - | 9 | 4.48 | - | - |
| Student | 52 | 7.40 | 306 | 55.64 | - | - | - | - | 9 | 4.48 | - | - |
| Employed | 487 | 69.27 | - | - | 128 | 96.97 | 94 | 97.92 | 138 | 68.66 | - | - |
| Employed and student | 40 | 5.69 | 97 | 17.64 | 3 | 2.27 | 2 | 2.08 | 6 | 2.99 | - | - |
| Looking for 1st occupation | 2 | 0.28 | - | - | - | - | - | - | - | - | - | - |
| Housewife | 3 | 0.43 | - | - | - | - | - | - | 23 | 11.44 | - | - |
| Retired | 17 | 2.42 | - | - | - | - | - | - | 16 | 7.96 | - | - |
| Preferred not to say | 4 | 0.57 | - | - | - | - | - | - | - | - | - | - |
| No answer at all | 94 | 13.37 | 147 | 26.73 | 1 | 0.76 | - | - | - | - | - | - |
| **Variable** | Mean | *SD* | Mean | *SD* | Mean | *SD* | Mean | *SD* | Mean | *SD* | Mean | SD |
| **Age** | 46.57 | 13.29 | 22.94 | 4.36 | 50.27 | 7.98 | 50.40 | 8.23 | 41.24 | 13.16 | 32.96 | 12.37 |

*Note.* *****Differently from the other studies, the provided level of education for participants enrolled in study 2 refers to their current level of education and not the highest level of education completed.

**Additional analysis for the Social Expectations items (Study 4)**

For the items assessing *Social Expectations* as they were originally conceived, which lacked explicit references to another gender group, one may say that they may be understood independently of gender. Even though participants were primed with considerations around gender inequalities from the title of the survey and the informed consent, we wanted to assess how people understood those items (one may implicitly understand “people” in place of “women;” e.g., “A woman who initiates sexual activities is seen as being sexually promiscuous” may be understood as “A person who initiates sexual activities is seen as being sexually promiscuous”). This understanding would have been detrimental to the validity of the scale.

To examine if the items included in the subscales of social expectations were understood independently of how these phenomena apply differently across genders, in Study 4 we added one question in which we listed them all and asked them if they thought that these expectations applied more to the group of women or the group of men (1*= more to the group of men*; 7 = *more to the group of women*). We ran a single-sample t-test against the critical number 4, representing the middle point of the scale and indicating that these expectations apply equally to women and men. Participants’ responses indicated that these expectations applied more strongly to the group of women than to the group of men (*M* = 5.96, *SD* = 1.30), *t*(200) = 21.37, *p* < .001.

**Differentiating the perceptions of the social treatment and experiences of women from personal experiences of sexism: additional analyses (Study 4)**

In the manuscript, we reported the main analyses that we conducted to test the incremental validity of the STEW compared to a measure of personal experiences of sexism in predicting outcomes like group-based emotions and intergroup attitudes. These outcomes, although individual-level variables, reflect group dynamics (Leach et al., 2015; Moscatelli et al., 2014). In particular, both group-based emotions (assessed as the extent to which participants experiences certain emotions when thinking about gender inequalities) and negative attitudes towards the advantaged group have been largely investigated by research in the relative deprivation tradition, which showed that the experience of relative deprivation was associated with these (see Smith et al., 2012, for a review).

To verify that the STEW is not a better predictor to personal experiences of sexism but represents a conceptually distinct construct, we also investigated wellbeing outcomes, specifically depression and negative affect. Prior research indicates a negative relationship between perceived gender discrimination and wellbeing (e.g., Barlow et al., 2021; Klonoff et al., 2000; Landrine et al., 1995), a link we expected to be driven by personal experiences of discrimination. We hypothesized that perceptions of differential treatment, as captured by the STEW, would not improve the prediction model for these wellbeing outcomes.

To test this, we conducted additional hierarchical regression analyses. In Step 1, we entered only the measure of personal experiences of sexism; in Step 2, we added all STEW subscales as predictors (see Table S2 for full regression results). For depression, the initial regression model was significant, with personal experiences of sexism significantly and positively associated with depression. After adding the STEW subscales, the model remained significant but showed no improvement over the initial model, and experiences of sexism remained the only significant predictor, uniquely contributing variance to the model.

Similarly, for negative affect, the first model was significant, with experiences of sexism significantly and positively associated with negative affect. Adding the STEW subscales in Step 2 yielded a model that remained significant but showed no improvement over the first; experiences of sexism continued to be the only significant predictor, contributing unique variance to the model.

**Table S2.**

*Standardized Regression Coefficients, F Tests and R2 of the Hierarchical Regressions (Study 4).*

|  | Depression | Negative Affect |
| --- | --- | --- |
| **Model 1** |  |  |
| Experience of Sexism | 0.33** | 0.32** |
| *R2 adj* | 0.10 | 0.10 |
| *F* (*df* = 1, 199) | 24.09** | 22.74** |
| **Model 2** |  |  |
| Experience of Sexism | 0.30** | 0.29** |
| Social Expectations | 0.04 | 0.08 |
| Workplace Inequalities | -0.08 | -0.07 |
| Domestic Imbalance | 0.06 | 0.12 |
| Harassment Towards Women | 0.06 | -0.02 |
| *R2 adj* | 0.09 | 0.09 |
| *∆R2* | 0.01 | 0.01 |
| *F* (*df* = 5, 195) | 5.08** | 5.16** |
| *∆F* (*df* = 4. 195) | 0.40 | 0.79 |

*Note.* ***p* < .01, **p* < .05.

These supplementary analyses confirm that while experiences of sexism uniquely predict individual wellbeing outcomes like depression and negative affect, the STEW’s utility lies in predicting group-based emotions and intergroup attitudes rather than personal well-being measures. These findings reinforce the conceptual distinction between the STEW and personal experiences of sexism, highlighting the STEW’s value for understanding responses to group-level gender inequalities.
